# Supplementary material for: Insights into the electrochemical degradation of phenolic lignin model compounds in a protic ionic liquid–water system
Source: Royal Society of Chemistry journal article supplement (doi:10.1039/d0gc03551c), 2020-12-23
Supplement: d0gc03551c1.pdf [file d0gc03551c1.pdf]

1 **Insights into the electrochemical degradation of phenolic lignin model compounds**  
2 **in protic ionic liquid-water system**

3 Guangyong Liu<sup>1,2#</sup>, Qian Wang<sup>1#</sup>, Dongxia Yan<sup>1</sup>, Yaqin Zhang<sup>1</sup>, Chenlu Wang<sup>1</sup>, Shijing  
4 Liang<sup>2</sup>, Lilong Jiang<sup>2\*</sup>, and Hongyan He<sup>1\*</sup>

5 <sup>1</sup> CAS Key Laboratory of Green Process and Engineering, State Key Laboratory of Multiphase  
6 Complex Systems, Beijing Key Laboratory of Ionic Liquids Clean Process, Institute of Process  
7 Engineering, Chinese Academy of Sciences, Beijing 100190, China.

8 <sup>2</sup> National Engineering Research Center of Chemical Fertilizer Catalyst, School of Chemical  
9 Engineering, Fuzhou University, Fuzhou 350002, Fujian, China.

10 # Co-first author

11 \*Corresponding author (email: jll@fzu.edu.cn; hyhe@ipe.ac.cn)

12 **1. MD simulation methods**

13 All simulations in this work were performed using the large-scale atomic/molecular massively  
14 parallel simulator (LAMMPS).<sup>1</sup> To analyze the structures and diffusion of O<sub>2</sub>, protic ionic  
15 liquid [BSO<sub>3</sub>Hmim][OTf], and four phenolic lignin model compounds (EP, PP, PBP, and  
16 2-PEP) in mixed systems with different water contents, we created five simulation boxes  
17 with different compositions and the details are shown in **Table S1**. Periodic boundary  
18 condition (PBC) was applied in the x-, y- and z-directions for each box. The parameters  
19 of the bond, angle, dihedral, and non-bond interactions of [BSO<sub>3</sub>Hmim][OTf] and the  
20 four phenolic lignin model compounds were described by the all-atom optimized potential  
21 for liquid simulations (OPLS-AA) force field,<sup>2-4</sup> which have been used successfully to  
22 obtain the structures and liquid properties.<sup>5-7</sup> The rigidly extended simple-point-charge  
23 (SPC/E) model was used to describe water molecules.<sup>8</sup> The SHAKE algorithm<sup>9</sup> was  
24 applied to O-H bonds to reduce the high-frequency vibrations. O<sub>2</sub> molecules in the gas  
25 phase were described by transferable potentials for phase equilibria-explicit hydrogen  
26 (TraPPE-EH) model with an additional point charge site.<sup>10</sup> The interactions between O<sub>2</sub>  
27 molecules, [BSO<sub>3</sub>Hmim][OTf] and the four phenolic lignin model compounds mainly  
28 include electrostatic and van der Waals terms, the former of which is long-range  
29 Coulombic interaction computed by particle-particle-particle-mesh (PPPM) algorithm,  
30 and the latter one was described by the 12-6 Lennard-Jones potential. The Lorentz-  
31 Berthelot mixing rule was used to model the parameters between different atomic  
32 species, which are truncated at 1.2 nm.

33 In MD simulations, the time step for integrating Newtonian equations of motion was 0.5  
34 fs, which was confirmed to ensure energy conservation. O<sub>2</sub>, [BSO<sub>3</sub>Hmim][OTf], H<sub>2</sub>O,  
35 and all phenolic lignin model compounds were relaxed in an NPT ensemble for 15 ns at  
36 a temperature of  $T = 300$  K and a pressure of  $P = 1.0$  atm along x, y and z-direction.  
37 After equilibration of the system, the NPT ensemble was changed to the NVT at a 300  
38 K temperature, where the temperature was controlled by Berendsen thermostat.<sup>11</sup> After

39 an equilibrium simulation of up to 2 ns, MD simulation continued to run an additional 3  
 40 ns in the NVE ensemble at 300 K to collect the data for analyzing the structural and  
 41 diffusion properties. The diffusion coefficients were calculated by statistical averaging  
 42 over at least 5 independent simulations.

43 **Table S1.** Numbers of studied ionic liquid [BSO<sub>3</sub>Hmim][OTf], water, phenolic lignin  
 44 model compounds (EP, PP, PBP, and 2-PEP), and O<sub>2</sub> in different systems.

| $V_{IL} : V_{water}$         | 1:0 | 4:1 | 2:1 | 1:1  |
|------------------------------|-----|-----|-----|------|
| $N_{IL}/\text{pair}$         | 149 | 122 | 102 | 76   |
| $N_{water}/\text{molecule}$  | 0   | 414 | 701 | 1060 |
| $N_{lignin}/\text{molecule}$ | 10  | 10  | 10  | 10   |
| $N_{O_2}/\text{molecule}$    | 9   | 14  | 12  | 9    |

45 The diffusion of cation and anion, oxygen, and model compounds in the electrolysis system  
 46 was obtained, and the results are shown in **Fig. S1**. It can be seen from the **Fig. S1** that the  
 47 diffusion of all the studied substances basically increases with the increase of water content.

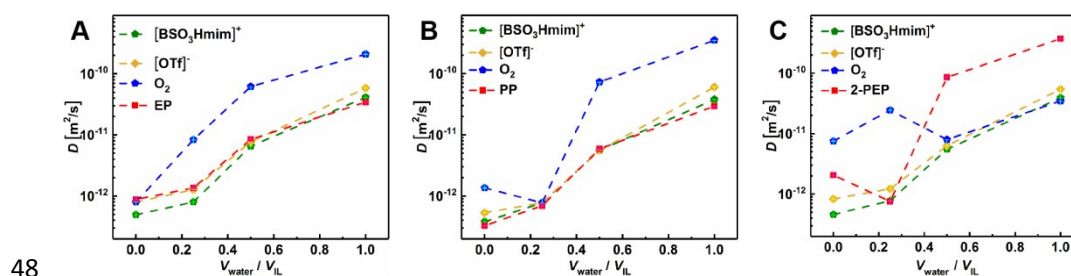

48 **Fig S1.** The diffusion coefficients of [BSO<sub>3</sub>Hmim]<sup>+</sup>, [OTf]<sup>-</sup>, O<sub>2</sub>, EP (A), PP (B) and 2-  
 49 PEP (C).  
 50

## 51 2. Determining how oxygen moves

52 The CV curves of GC electrode in [BSO<sub>3</sub>Hmim][OTf] or [BSO<sub>3</sub>Hmim][OTf]-H<sub>2</sub>O system  
 53 under O<sub>2</sub> atmosphere at different scanning rates are shown in **Fig. S2**. The linear fitting of the  
 54 peak current ( $I_p$ ) to the scan rate ( $v$ ) or the square root of the scan rate ( $v^{1/2}$ ) was performed for  
 55 peak **a**. Compared with the results shown in **Fig. S2E-F**, it was demonstrated that a better linear  
 56 relationship lies in  $I_p$ - $v^{1/2}$  for peak **a** in [BSO<sub>3</sub>Hmim][OTf]-H<sub>2</sub>O system than that of in pure  
 57 IL, indicating that the electrode reaction process is diffusion-controlled. In other words, when  
 58 a certain amount of water is added to the electrolysis system, the rate of the ORR process (peak  
 59 **a**) is controlled by the diffusion of the dissolved O<sub>2</sub> molecules to the working electrode surface.

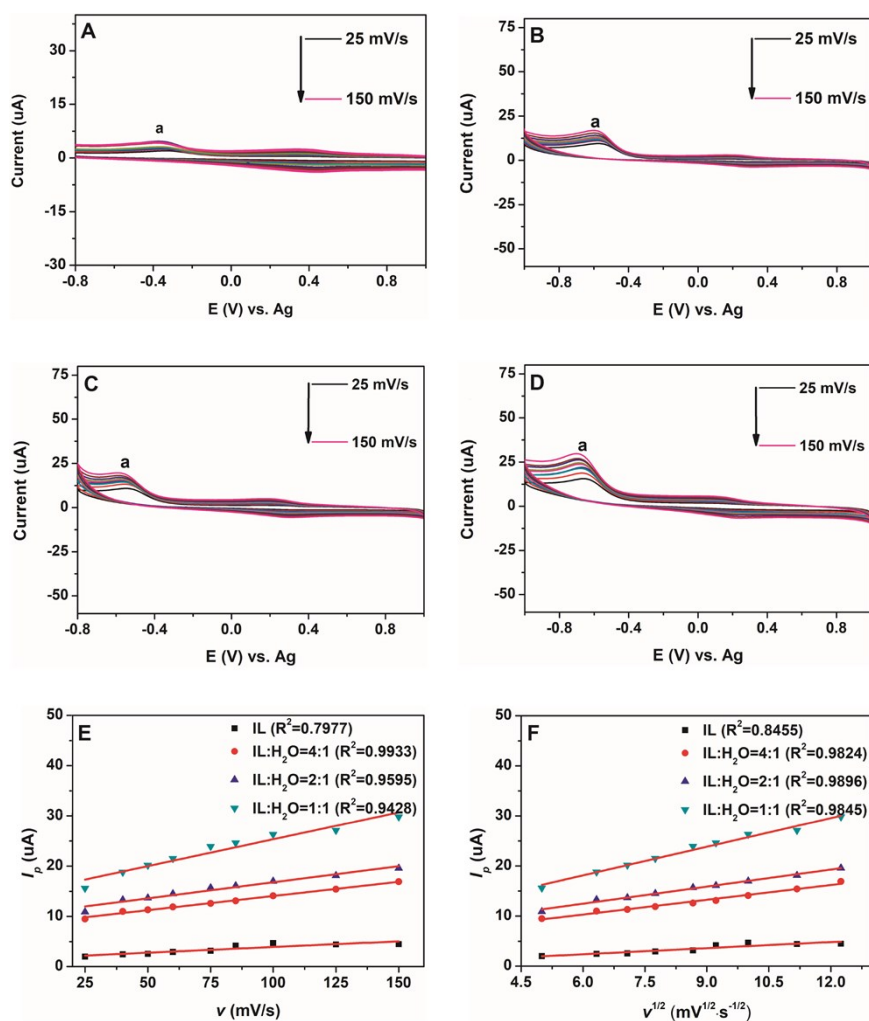

60

61 **Fig S2.** CV curves of GC electrode in (A) [BSO<sub>3</sub>Hmim][OTf] and [BSO<sub>3</sub>Hmim][OTf]-H<sub>2</sub>O  
 62 system with volume ratio of (B) 4:1, (C) 2:1 and (D) 1:1, under O<sub>2</sub> atmosphere at scanning rates  
 63 of 25, 40, 50, 60, 75, 85, 100, 125, 150 mV s<sup>-1</sup>, respectively. (E) The linear relationship of *I<sub>p</sub>*  
 64 vs. *v* and (F) the linear relationship of *I<sub>p</sub>* vs. *v*<sup>1/2</sup> for peak **a**.

### 65 3. Redox mechanism of *p*-benzoquinone and *o*-hydroxyphenol

66 In **Fig. S3A**, when the potential was swept forward from the open circuit potential to about 1.0  
 67 V, it can be found that there is no peak in the 1<sup>st</sup> segment, a reduction peak **e** of *p*-benzoquinone  
 68 (*p*-BQ) appears in the 2<sup>nd</sup> segment, and an oxidation peak **f** appears in the 3<sup>rd</sup> segment. It can be  
 69 inferred that *p*-BQ is first reduced to hydroquinone (peak **e**), and then hydroquinone is oxidized  
 70 to *p*-BQ (peak **f**). The redox mechanism of hydroquinone and *p*-BQ is shown in **Scheme S1A**.  
 71 In **Fig. S3B**, when the potential was swept forward from the open circuit potential to about -1.0  
 72 V, it can be found that there is no peak in the 1<sup>st</sup> segment, an oxidation peak **g** of *o*-  
 73 hydroxyphenol (*o*-HP) appears in the 2<sup>nd</sup> segment, and a reduction peak **h** appears in the 3<sup>rd</sup>  
 74 segment. It can be inferred that *o*-HP is first oxidized to quinone (peak **g**), and then quinone is  
 75 reduced to *o*-HP (peak **h**). The redox mechanism of *o*-HP and *o*-quinone is shown in **Scheme**  
 76 **S1B**.

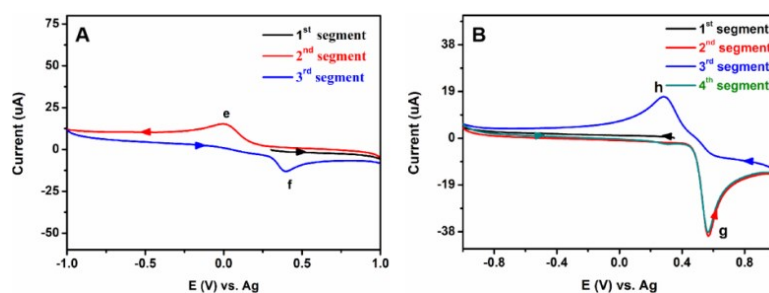

77

78 **Fig S3.** CV curves of GC electrode in [BSO<sub>3</sub>Hmim][OTf]-H<sub>2</sub>O with 1 mM *p*-BQ (A, 1:1) and  
 79 4 mM *o*-HP (B, 2:1) under N<sub>2</sub> atmosphere at a scanning rate of 50 mV s<sup>-1</sup> at room temperature.  
 80

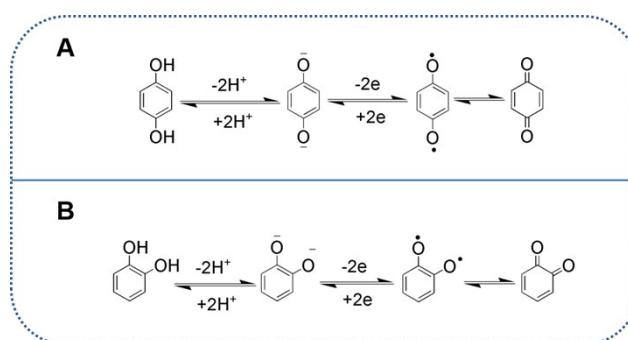

81

82 **Scheme S1.** Redox mechanism of *p*-BQ (A) and *o*-HP (B).<sup>12</sup>

#### 83 4. Electrochemical behavior of EP, PP and 2-PEP in [BSO<sub>3</sub>Hmim][OTf]-H<sub>2</sub>O system

84 The segment-by-segment analysis of the electrochemical behavior of EP, PP and 2-PEP under  
 85 N<sub>2</sub> atmosphere were performed, and their CV curves were very similar to that of PBP, and  
 86 results are shown in **Fig. S4**. The potential was swept negatively from the open circuit potential  
 87 to about -1.0 V. There is no peak in the 1<sup>st</sup> segment. Then, oxidation peaks (**1c**, **2c**, **2e** and **4c**),  
 88 and reduction peaks (**1b**, **2b** and **4b**) appear in the 2<sup>nd</sup> and 3<sup>rd</sup> segments. The CV curves of EP  
 89 and 2-PEP have two oxidation peaks (**1c** and **1d**, **4c** and **4d**) in the 4<sup>th</sup> segment, while PP have  
 90 three oxidation peaks (**2c**, **2d** and **2e**), as shown in **Fig. S4B**. We know that peaks **1c**, **2c** and **4c**  
 91 are the results of oxidation of phenolic hydroxyl groups, the reason for which has been  
 92 explained in **Section 3.3** of the main text.

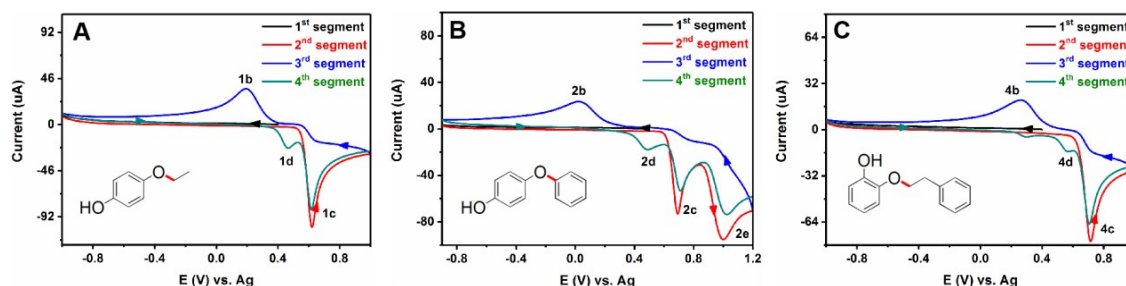

93

94 **Fig S4.** CV curves of GC electrode in [BSO<sub>3</sub>Hmim][OTf]-H<sub>2</sub>O (2:1) with 10 mM EP (A), PP  
 95 (B), and 2-PEP (C) under N<sub>2</sub> atmosphere at a scanning rate of 50 mV s<sup>-1</sup> at room temperature.

96 During the redox cycling, EP, PP and 2-PEP may be converted into the corresponding quinone  
 97 (or hydroquinone) and hydroxyl compounds. Among them, the electrocatalytic oxidation-  
 98 reduction of quinone (or hydroquinone) is relatively easy to occur, which results in the  
 99 reversible conversion of quinone and hydroquinone. To confirm the speculation, we further  
 100 carried out the electrochemical reduction-oxidation reaction of *p*-BQ and *o*-HP under N<sub>2</sub>  
 101 atmosphere, and results are shown in **Fig. S3**. Notably, the potential of peaks **1d**, **2d** and **f** are  
 102 almost equal. So, the oxidation peaks **1d** and **2d** are related to hydroquinone oxidation (**Fig.**  
 103 **S5A, B**, and **Scheme S1A**). As for the reduction peak **e**, it overlaps with the peaks **1b** and **2b**.  
 104 The C-O cleavage of PP can be converted to hydroquinone and hydroxyl compounds, i.e., *p*-  
 105 BQ and phenol. However, phenol also has redox properties in electrochemistry. As illustrated  
 106 in **Fig. S5D**, the potential of peaks **2e** and **i** are practically equal, meaning that **2e** is related to  
 107 phenol oxidation. As shown in **Fig. S5C** and **S3B** and **Scheme S1B**, the oxidation peak **4d** is  
 108 related to the oxidation of *o*-HP.

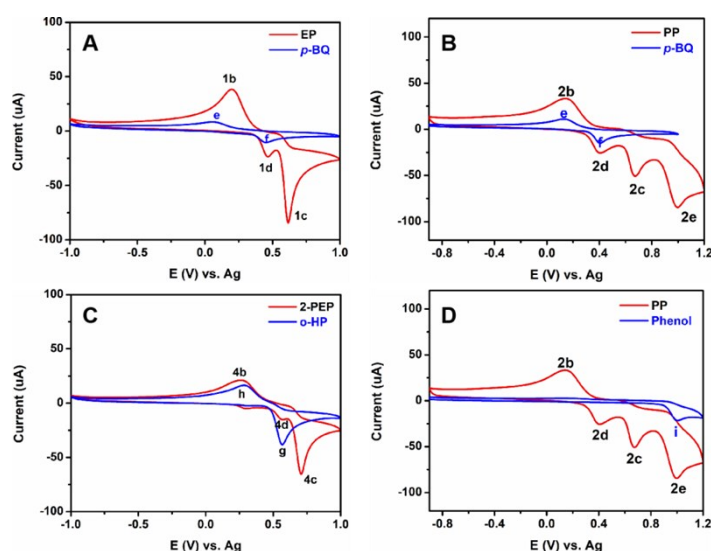

109

110 **Fig S5.** Comparison of GC electrode CV curves of different substrates in [BSO<sub>3</sub>Hmim][OTf]-  
 111 H<sub>2</sub>O (2:1) under N<sub>2</sub> atmosphere at room temperature. Scan rate: 50 mV s<sup>-1</sup>. A, B-10 mM EP  
 112 and PP (red) compared with 2 mM *p*-BQ (blue). C-10 mM 2-PEP (red) compared with 4 mM  
 113 *o*-HP (blue). D-10 mM PP (red) compared with 4 mM phenol (blue).

### 114 5. Possible redox mechanism of EP, PP, PBP, and 2-PEP

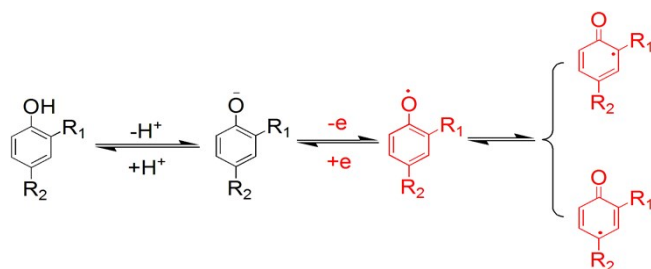

115

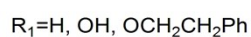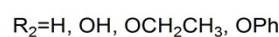

116 **Scheme S2.** Redox mechanism of EP, PP, PBP, and 2-PEP.<sup>13,14</sup>

## 117 6. The degradation of PBP in water, ionic liquid and ionic liquid-water systems

118 A comparative study of the degradation of PBP in water, ionic liquid, and ionic liquid-water  
119 systems was carried out, and the results are shown in **Fig. S6**. It can be observed that after 12  
120 hours of electrolysis, the degradation percentage of PBP in the water system is only 4.25%,  
121 which is much lower than that of 42.54% (in [BSO<sub>3</sub>Hmim][OTf]) and 89.08% (in  
122 [BSO<sub>3</sub>Hmim][OTf]-H<sub>2</sub>O (2:1)), resulting from the fact that PBP is almost insoluble in water  
123 and thus reducing the degradation of PBP. For the [BSO<sub>3</sub>Hmim][OTf] and [BSO<sub>3</sub>Hmim][OTf]-  
124 H<sub>2</sub>O (2:1) systems, the addition of water leads to the decrease in the viscosity of the latter  
125 system, which facilitates the diffusion of the substrate to the electrode surface, resulting in a  
126 high degradation percentage.

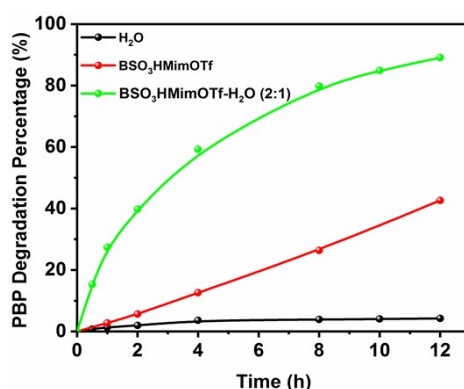

127

128 **Fig S6.** Degradation percentage of PBP in different systems. Blackline, H<sub>2</sub>O; Redline,  
129 [BSO<sub>3</sub>Hmim][OTf]; Greenline, [BSO<sub>3</sub>Hmim][OTf]-H<sub>2</sub>O (2:1). Conditions: RuO<sub>2</sub>-IrO<sub>2</sub>/Ti mesh  
130 (at 0.60 V) used as the working electrode, 20 mmol PBP, N<sub>2</sub> atmosphere, room temperature.

## 131 7. Kinetic investigation of PBP degradation at different working electrodes

132 The degradation of PBP was performed in a three-electrode cell with alternating RuO<sub>2</sub>-IrO<sub>2</sub>/Ti  
133 mesh (at 0.6 V) and graphite felt (at -0.6 V) as the working electrode and the other as the counter  
134 electrode. **Fig. S7** shows the kinetics of the degradation process, and it can be noticed that  
135 although the working electrodes are different, the kinetic results are similar. Comparing the  
136 data of **Fig. S7**, it can be observed that the initial rate ( $v_0$ ) under O<sub>2</sub> atmosphere is higher than  
137 that of under N<sub>2</sub> atmosphere, which implies that PBP undergoes both indirect oxidation by in  
138 situ generated H<sub>2</sub>O<sub>2</sub> and direct oxidation by the electrode under O<sub>2</sub> atmosphere, while only  
139 direct oxidation on the electrode under N<sub>2</sub> atmosphere. Moreover, the indirect H<sub>2</sub>O<sub>2</sub> oxidation  
140 at different working electrodes is not a major contribution to the initial rate of PBP degradation,  
141 which is  $\Delta v_0=0.0119$  (**Fig. S7A**) and 0.02205 mmol/(L·min) (**Fig. S7B**), respectively.  
142 Therefore, the direct oxidation of PBP on the electrode dominates the whole electrolysis  
143 process.

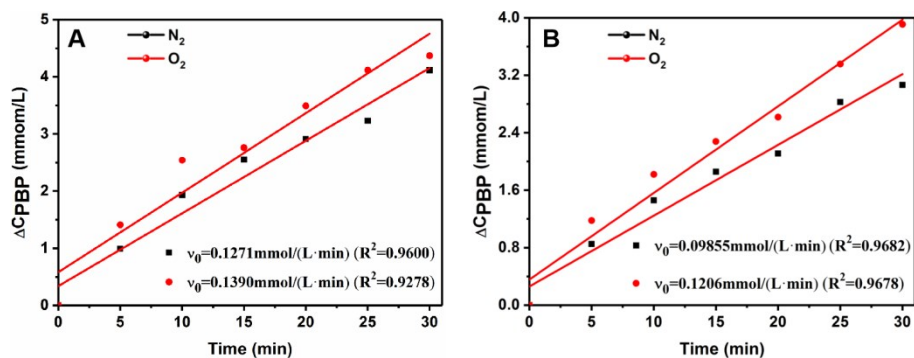

144

145 **Fig S7.** Kinetic study of electrocatalytic degradation of PBP at different working electrodes.  
 146 (A) Graphite felt working electrode hold at -0.6 V. (B) RuO<sub>2</sub>-IrO<sub>2</sub>/Ti mesh working electrode  
 147 hold at 0.6 V. Conditions: 20 mM PBP, room temperature, [BSO<sub>3</sub>Hmim][OTf]-H<sub>2</sub>O (2:1).

### 148 8. Stability of the electrolysis system

149 To ensure that the electrolyte does not decompose prior to substrate degradation, we verified  
 150 the CV curves of the water and [BSO<sub>3</sub>Hmim][OTf]-H<sub>2</sub>O electrolytes before performing the  
 151 degradation experiments, and the results are shown in **Fig. S8**. It is found that the CV curves of  
 152 water (black line) and [BSO<sub>3</sub>Hmim][OTf]-H<sub>2</sub>O (red line) do not show redox peaks. Meanwhile,  
 153 no bubbles are observed on the electrode surface during the reaction, which indicates that the  
 154 electrolysis system is quite stable.

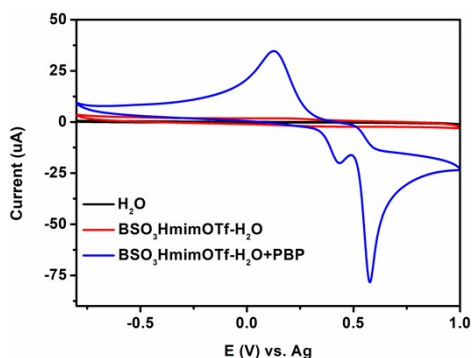

155

156 **Fig S8.** CV curves recorded on GC electrode under N<sub>2</sub> atmosphere. Deionized water (black  
 157 line), [BSO<sub>3</sub>Hmim][OTf]-H<sub>2</sub>O (red line), [BSO<sub>3</sub>Hmim][OTf]-H<sub>2</sub>O+PBP (blue line).

### 158 9. Study of the chemical stability of ionic liquid

159 The stability of ionic liquid was investigated by constant voltage electrolysis using RuO<sub>2</sub>-  
 160 IrO<sub>2</sub>/Ti (at 1 V) mesh as the working electrode, and the ionic liquid was characterized by Fourier  
 161 transform infrared (FT-IR) spectroscopy after electrolysis. The results are shown in **Fig. S9**,  
 162 wherein (A) is the FT-IR spectra of ionic liquid after 12 h electrolysis, (B) is the FT-IR spectra  
 163 of ionic liquid after 4 h electrolysis, (C) is the FT-IR spectra of pure ionic liquid without  
 164 electrolysis. It is found that the vibrational peaks of the FT-IR spectra are almost the same,  
 165 indicating that the ionic liquids used in this experiment have preferable stability.



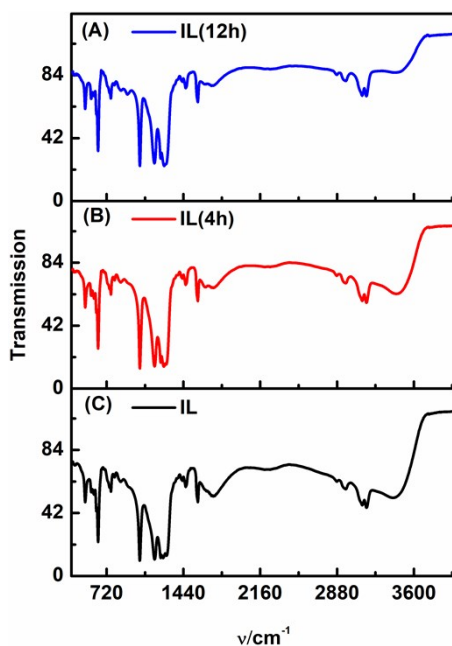

166

167 **Fig S9.** FT-IR spectra of IL system. (A): FT-IR spectra of ionic liquid after 12 h electrolysis,  
 168 (B): FT-IR spectra of ionic liquid after 4 h electrolysis, (C): FT-IR spectra of pure ionic liquid  
 169 without electrolysis.

170 **10. Chromatograms EP, PP, PBP and 2-PEP in [BSO<sub>3</sub>Hmim][OTf]-H<sub>2</sub>O (2:1) electrolyte**

171 **Fig. S10** shows the HPLC chromatograms of the four lignin model compounds studied,  
 172 ethoxyphenol (**1**, EP), 4-phenoxyphenol (**2**, PP), p-benzyloxyphenol (**3**, PBP) and 2-(2-  
 173 phenoxyethoxy)phenol (**4**, 2-PEP), in the [BSO<sub>3</sub>Hmim][OTf]-H<sub>2</sub>O (2:1) electrolyte. It can be  
 174 seen that no degradation reaction occurs in the absence of external conditions.

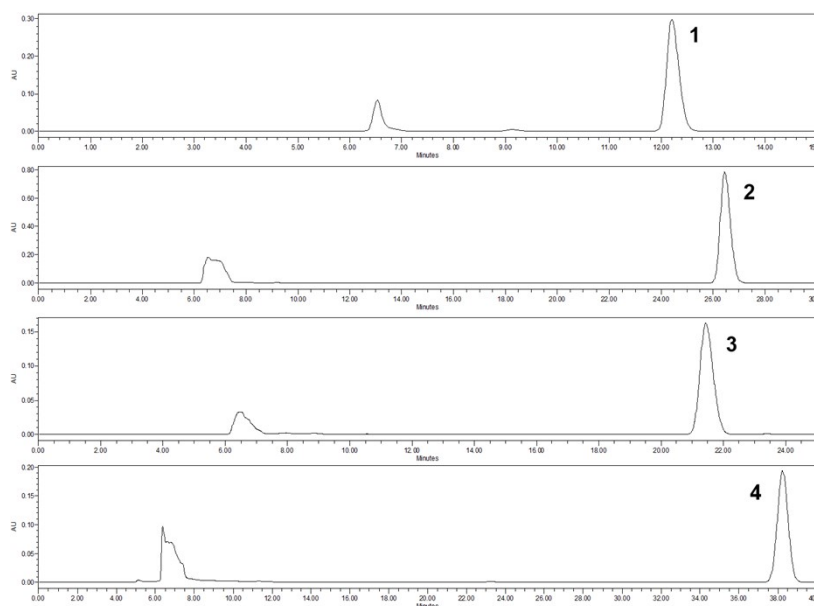

175

176 **Fig S10.** Chromatograms of [BSO<sub>3</sub>Hmim][OTf]-H<sub>2</sub>O (2:1) electrolyte containing 20 mM EP,  
 177 PP, PBP and 2-PEP were determined by HPLC. Conditions: room temperature, reaction time  
 178 12 h, under air atmosphere.



## 179 11. Degradation products of PBP

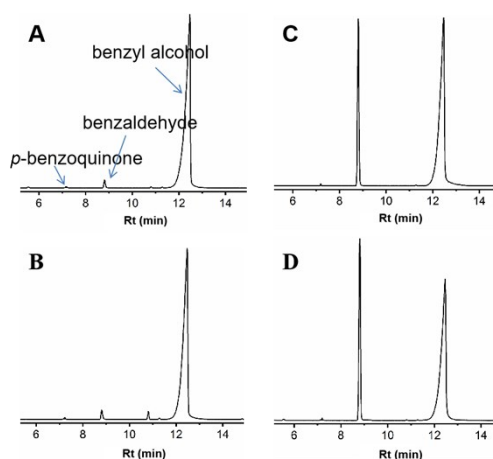

180

181 **Fig S11.** Gas chromatograms of PBP degradation products. Conditions: (A) and (B), RuO<sub>2</sub>-  
182 IrO<sub>2</sub>/Ti mesh electrode hold at 0.6 V; (C) and (D), graphite felt electrode hold at 0.6 V. Room  
183 temperature, reaction time 12 h, under both N<sub>2</sub> and O<sub>2</sub> atmosphere, respectively.

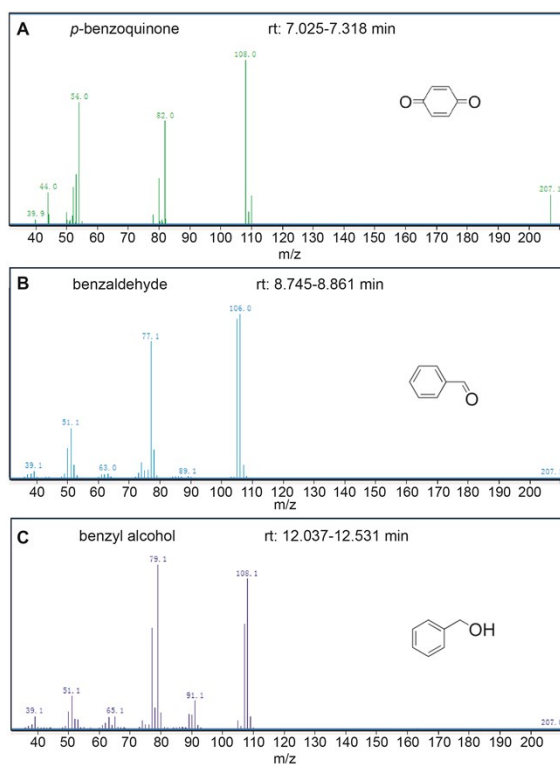

184

185 **Fig S12.** Mass spectra of PBP degradation products. (A), (B) and (C) are *p*-BQ, benzaldehyde,  
186 and benzyl alcohol, respectively.

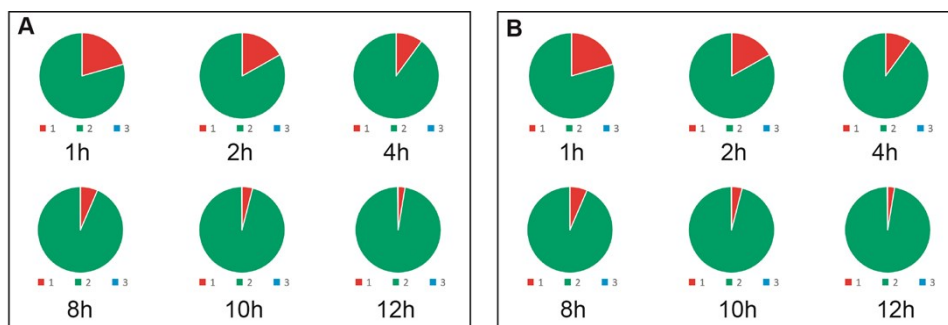

187

188 **Fig S13.** Products distribution at different times. Conditions: RuO<sub>2</sub>-IrO<sub>2</sub>/Ti mesh used as  
 189 working electrode hold at 0.6 V, 20 mM PBP, room temperature, [BSO<sub>3</sub>Hmim][OTf]-H<sub>2</sub>O  
 190 (2:1). (A) N<sub>2</sub> atmosphere, (B) O<sub>2</sub> atmosphere. 1, *p*-BQ; 2, benzyl alcohol; 3, benzaldehyde.

191

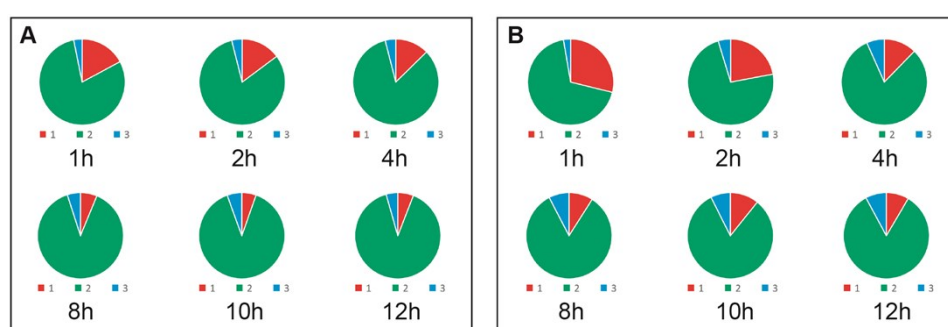

192

193 **Fig S14.** Products distribution at different times. Conditions: Graphite felt used as working  
 194 electrode hold at 0.6 V, 20 mM PBP, room temperature, [BSO<sub>3</sub>Hmim][OTf]-H<sub>2</sub>O (2:1). (A) N<sub>2</sub>  
 195 atmosphere, (B) O<sub>2</sub> atmosphere. 1, *p*-BQ; 2, benzyl alcohol; 3, benzaldehyde.

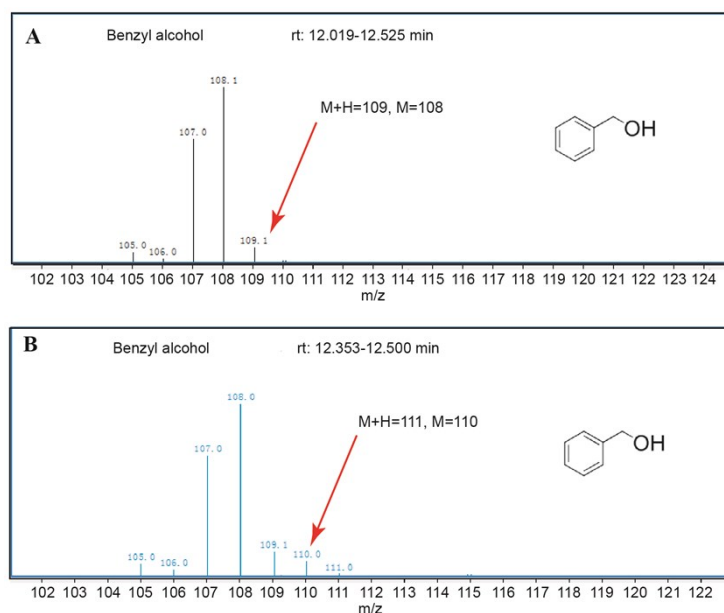

196

197 **Fig S15.** (A) Mass spectrum of benzyl alcohol with H<sub>2</sub>O as hydroxyl donor. (B) Mass spectrum  
 198 of benzyl alcohol with H<sub>2</sub><sup>18</sup>O as hydroxyl donor. Conditions: RuO<sub>2</sub>-IrO<sub>2</sub>/Ti mesh used as  
 199 working electrode hold at 0.6 V, N<sub>2</sub> atmosphere, room temperature.

200 **12. Degradation products of EP**

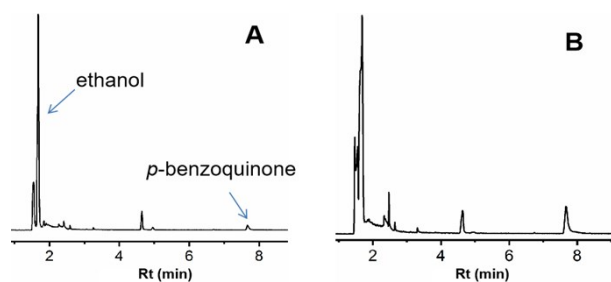

201

202 **Fig S16.** Gas chromatograms of EP degradation products. Conditions: RuO<sub>2</sub>-IrO<sub>2</sub>/Ti mesh  
 203 electrode hold at 0.6 V, room temperature, reaction time 12 h, under both N<sub>2</sub> and O<sub>2</sub> atmosphere,  
 204 respectively.

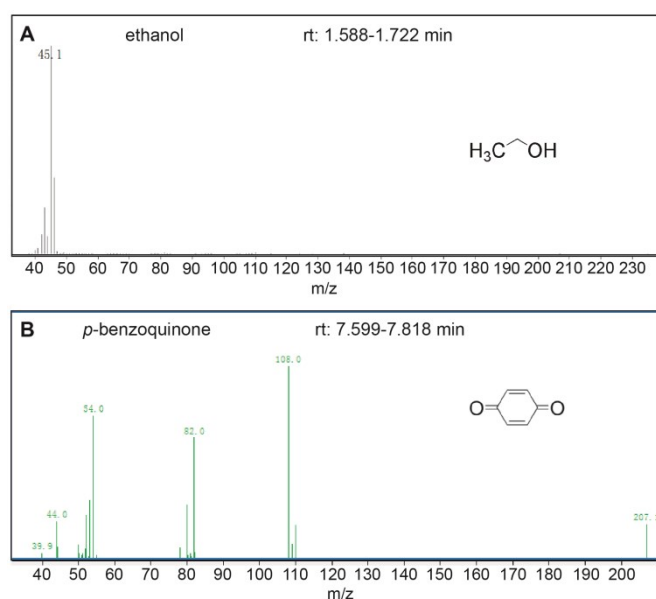

205

206 **Fig S17.** Mass spectra of EP degradation products. (A), ethanol; (B), *p*-BQ.

207 **13. Possible electrochemical degradation mechanism of EP**

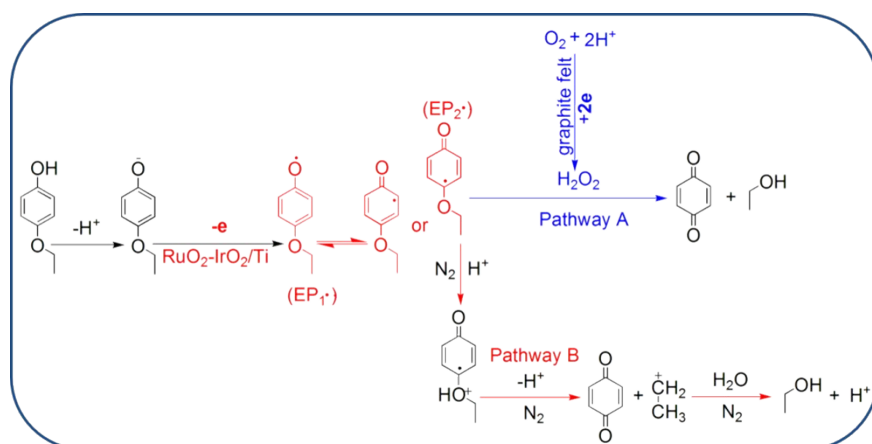

208

209 **Scheme S3.** Possible electrochemical degradation mechanism of EP in [BSO<sub>3</sub>Hmim][OTf]-  
 210 H<sub>2</sub>O system *via* direct (Pathway B) and indirect oxidation (Pathway A).

211 **14. Degradation products of PP**

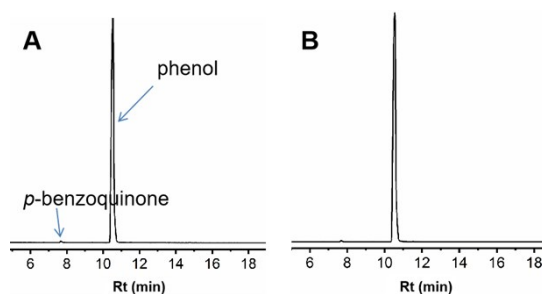

212

213 **Fig S18.** Gas chromatograms of PP degradation products. Conditions: RuO<sub>2</sub>-IrO<sub>2</sub>/Ti mesh  
 214 electrode hold at 0.75 V, room temperature, reaction time 12 h, under both N<sub>2</sub> and O<sub>2</sub>  
 215 atmosphere, respectively.

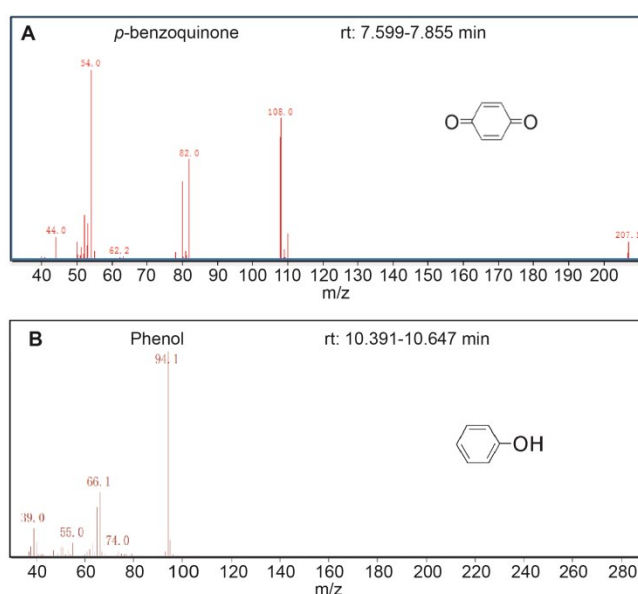

216

217 **Fig S19.** Mass spectra of PP degradation products. (A), *p*-BQ; (B), phenol.

218 **15. Possible electrochemical degradation mechanism of PP**

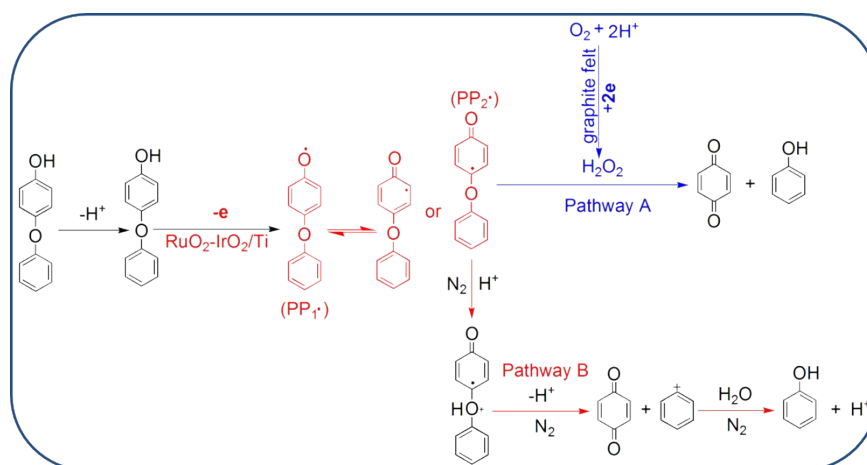

219

220 **Scheme S4.** Possible electrochemical degradation mechanism of PP in [BSO<sub>3</sub>Hmim][OTf]-  
 221 H<sub>2</sub>O system *via* direct (Pathway B) and indirect oxidation ( Pathway A).

222 **16. Degradation products of 2-PEP**

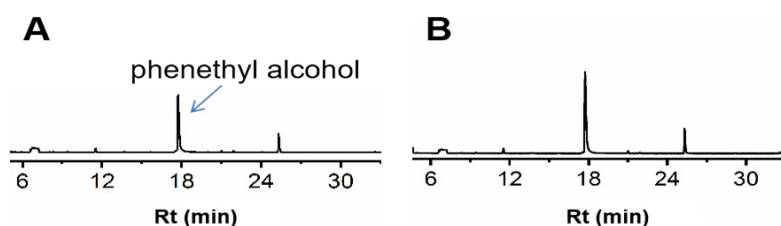

223

224 **Fig S20.** Gas chromatograms of 2-PEP degradation product. Conditions: RuO<sub>2</sub>-IrO<sub>2</sub>/Ti mesh  
 225 electrode hold at 0.71 V, room temperature, reaction time 12 h, under both N<sub>2</sub> and O<sub>2</sub>  
 226 atmosphere, respectively.

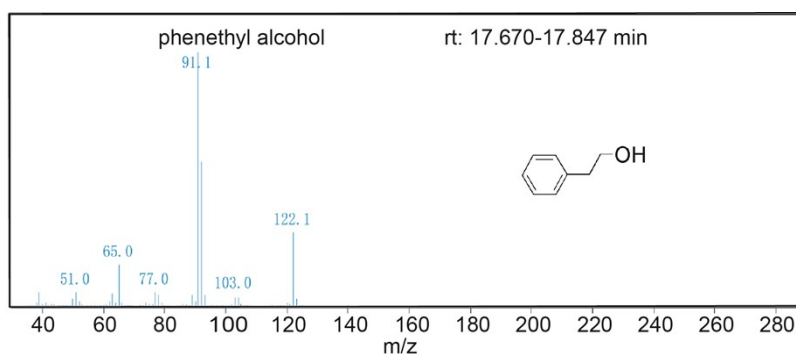

227

228 **Fig S21.** Mass spectrum of 2-PEP degradation product.

229 **17. Possible electrochemical degradation mechanism of 2-PEP**

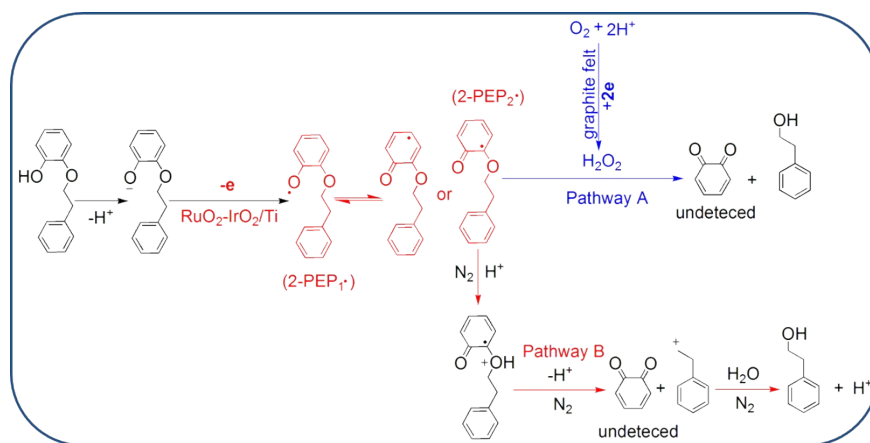

230

231 **Scheme S5.** Possible electrochemical degradation mechanism of 2-PEP in [BSO<sub>3</sub>Hmim][OTf]-  
 232 H<sub>2</sub>O system *via* direct (Pathway B) and indirect oxidation ( Pathway A).

233

234 **References**

- 235 1 S. Plimpton, *J. Comput. Phys.*, 1995, **117**, 1-19.  
 236 2 J. N. C. Lopes and A. A. H. Padua, *J. Phys. Chem. B*, 2004, **108**, 16893-16898.  
 237 3 J. N. C. Lopes, A. A. H. Padua and K. Shimizu, *J. Phys. Chem. B*, 2008, **112**, 5039-5046.  
 238 4 J. N. C. Lopes, J. Deschamps and A. A. H. Padua, *J. Phys. Chem. B*, 2004, **108**, 2038-2047.

- 239 5 C. Qian, B. Ding, Z. W. Wu, W. L. Ding, F. Huo, H. Y. He, N. Wei, Y. L. Wang and X. P. Zhang,  
240 *Ind. Eng. Chem. Res.*, 2019, **58**, 20109-20115.
- 241 6 C. L. Wang, Y. L. Wang, Y. M. Lu, H. Y. He, F. Huo, K. Dong, N. Wei and S. J. Zhang, *Phys. Chem.*  
242 *Chem. Phys.*, 2019, **21**, 12767-12776.
- 243 7 Y. L. Wang, C. L. Wang, Y. Q. Zhang, F. Huo, H. Y. He and S. J. Zhang, *Small*, 2019, **15**, 10.
- 244 8 H. J. C. Berendsen, J. R. Grigera and T. P. Straatsma, *J. Phys. Chem.*, 1987, **91**, 6269-6271.
- 245 9 J. P. Ryckaert, G. Ciccotti and H. J. C. Berendsen, *J. Comput. Phys.*, 1977, **23**, 327-341.
- 246 10 N. Hansen, F. A. B. Agbor and F. J. Keil, *Fluid Phase Equilibr.*, 2007, **259**, 180-188.
- 247 11 H. J. C. Berendsen, J. P. M. Postma, J. P. M. van Gunsteren, A. DiNola and J. R. Haak, *J. Chem.*  
248 *Phys.*, 1984, **81**, 3684-3690.
- 249 12 L. Ma, Z. Wang and Q. Li, *Analyst*, 2012, **137**, 432-436.
- 250 13 T. A. Enache and A. M. Oliveira-Brett, *J. Electroanal. Chem.*, 2011, **655**, 9-16.
- 251 14 L. Wang, S. Liu, H. Jiang, Y. Chen, L. Wang, G. Duan, Y. Sun, Y. Chen and P. Wan, *J. Electrochem.*  
252 *Soc.*, 2018, **165**, H705-H710.
